# Supplementary material for: Spiky nanohybrids of TiO2/Au nanorods for enhanced hydrogen evolution and photocurrent generation
Source: Royal Society of Chemistry journal article supplement (doi:10.1039/c7qi00717e), 2017-12-26
Supplement: c7qi00717e1.pdf [file c7qi00717e1.pdf]

## Supporting Information

### **Spiky TiO<sub>2</sub>/Au nanorod nanohybrids for enhanced hydrogen evolution and photocurrent generation**

Shan Zeng<sup>a</sup>, Hang Sun<sup>a,\*</sup>, Yilun Wu<sup>b</sup>, Yinxing Shang<sup>a</sup>, Ping She<sup>a</sup>, Qinrong He<sup>a</sup>, Shengyan Yin<sup>b</sup>, Zhenning Liu<sup>a,\*</sup>

<sup>a</sup> Key Laboratory of Bionic Engineering (Ministry of Education), College of Biological and Agricultural Engineering, Jilin University, Changchun, Jilin 130022, China

<sup>b</sup> State Key Laboratory on Integrated Optoelectronics, College of Electronic Science and Engineering, Jilin University, Changchun, Jilin 130012, China

\*Corresponding author email: sunhang@jlu.edu.cn; liu\_zhenning@jlu.edu.cn

### Preparation of spiky TiO<sub>2</sub>/AuNS nanohybrids

AuNSs were used in place of AuNRs to prepare spiky TiO<sub>2</sub>/AuNS nanohybrids under otherwise identical conditions. Specifically, the as-prepared citrate-stabilized AuNSs solution (30 nm, 16 mL) was concentrated by centrifugation at 6000 rpm for 8 min to remove the aqueous supernatant. Subsequently, the concentrated AuNSs were added into 8 mL CTAB (0.1 mM) to exchange with citrate. After 24 h incubation, the obtained AuNSs were concentrated by centrifugation and used to prepare spiky TiO<sub>2</sub>/AuNS nanohybrids following the same steps as that of spiky TiO<sub>2</sub>/AuNR nanohybrids.

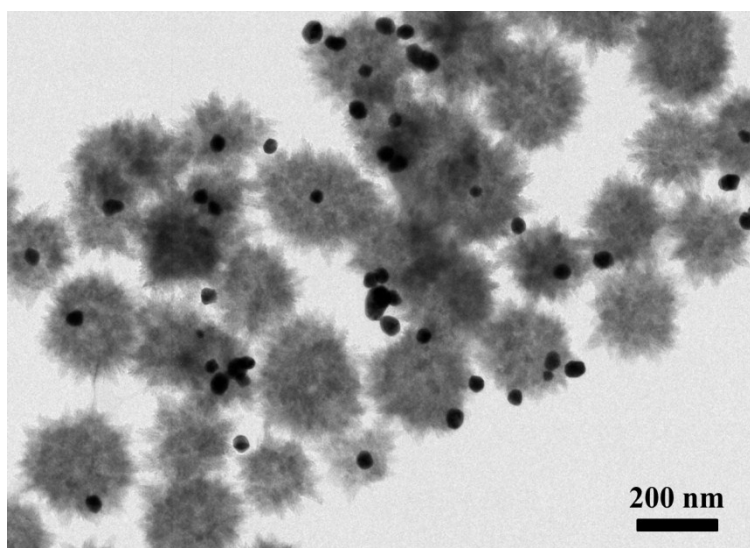

**Fig. S1** TEM image of spiky TiO<sub>2</sub>/AuNS nanohybrids.
